# Supplementary material
Source: PubMed Central journal article supplement (PMC4860816)
Supplement: NIHMS780759-supplement-A1.pdf [file NIHMS780759-supplement-A1.pdf]

## Appendix S1. Recently published studies on the link between biodiversity and disease

### Frontiers in research on biodiversity and disease

Pieter T. J. Johnson<sup>1</sup>, Richard S. Ostfeld<sup>2</sup>, and Felicia Keesing<sup>3</sup>

<sup>1</sup>Ecology and Evolutionary Biology, University of Colorado, Boulder, CO 80309, USA

<sup>2</sup>Cary Institute of Ecosystem Studies, Millbrook, NY 12545, USA

<sup>3</sup>Biology Program, Bard College, Annandale-on-Hudson, NY 12504, USA

*Corresponding author: pieter.johnson@colorado.edu, 303.492.5623 (ph); 303.492.8699 (fax)*

**Results of a Web of Science search for papers between 2012 and April 2014 on the relationship between diversity and disease.** Our search string was: TS=(species OR host\* OR communit\*) AND TS=(\*diversity OR richness) AND TS=(risk\* OR infect\* OR emerge\* OR transmi\*) AND TS=(pathogen\* OR parasit\* OR disease\* OR bacteri\* OR virus\* OR viral OR fung\* OR myco\* OR nematod\* OR trematod\* OR cestod\* OR ectoparasit\* OR acanthoceph\* OR protist\* OR protozoa\* OR helminth\*) AND Language=(English) AND Document Types=(Article). Timespan=2012-2014. Databases=SCI-EXPANDED. The initial search returned ~5000 papers, of which the vast majority were not relevant to the topic and discarded. All reviews and purely theoretical papers were discarded, as were those in which diversity and/or disease were not quantified and in which disease affected diversity (reverse causality) rather than diversity affecting disease (causality of interest). The remaining papers are categorized by the pathogen or disease; the type of host and disease (e.g., human, non-zoonotic); the metric of disease (e.g., disease state refers to presence or absence); the biological entity for which diversity was measured; the specific diversity metric used; whether the study was experimental or non-experimental.

| Pathogen/disease                                                | Disease type        | Disease metric           | Diversity entity                       | Diversity metric | Exp/non | Ref |
|-----------------------------------------------------------------|---------------------|--------------------------|----------------------------------------|------------------|---------|-----|
| Periodontitis, human                                            | Human, non-zoonotic | Disease severity         | Subgingival plaque bacterial community | Shannon, Simpson | Exp     | [1] |
| Periodontitis, human                                            | Human, non-zoonotic | Disease state            | Subgingival plaque bacterial community | Shannon          | Non     | [2] |
| Intestinal inflammation following graft vs host disease, humans | Human, non-zoonotic | Disease state            | Intestinal microbiome                  | Shannon          | Exp     | [3] |
| Malaria, An. gambiae                                            | Human, non-zoonotic | P. falciparum prevalence | Mosquito midgut bacterial community    | Shannon          | Exp     | [4] |
| Cystic fibrosis, humans                                         | Human, non-zoonotic | Disease severity         | Pulmonary microbiota                   | Species richness | Non     | [5] |

|                                               |                     |                                  |                                |                            |     |      |
|-----------------------------------------------|---------------------|----------------------------------|--------------------------------|----------------------------|-----|------|
| Cystic fibrosis, humans                       | Human, non-zoonotic | Disease state                    | Pulmonary microbiota           | Shannon                    | Non | [6]  |
| Interstitial cystitis, humans                 | Human, non-zoonotic | Disease state                    | Urine microbiota               | Shannon, species richness  | Non | [7]  |
| Chronic rhinosinusitis, humans                | Human, non-zoonotic | Disease state                    | Sinus microbiome               | Shannon                    | Non | [8]  |
| Clostridium difficile infection, humans       | Human, non-zoonotic | Disease severity                 | Fecal microbiota               | Shannon, species richness  | Exp | [9]  |
| Cystic fibrosis, humans                       | Human, non-zoonotic | Disease severity                 | Oral microbiome                | Shannon                    | Non | [10] |
| Acute otitis media, humans                    | Human, non-zoonotic | Pathogen presence, disease state | Upper respiratory microbiota   | Shannon                    | Non | [11] |
| Atopic dermatitis, humans                     | Human, non-zoonotic | Disease state                    | Skin bacterial community       | Shannon                    | Exp | [12] |
| Cystic fibrosis, humans                       | Human, non-zoonotic | Disease severity                 | Bacterial community in airways | Shannon                    | Non | [13] |
| Cystic fibrosis, humans                       | Human, non-zoonotic | Disease severity                 | Bacterial community in airways | Shannon, species richness  | Non | [14] |
| Dental caries, humans                         | Human, non-zoonotic | Disease state                    | Oral bacterial community       | Shannon                    | Non | [15] |
| Periodontitis, humans                         | Human, non-zoonotic | Disease state                    | Oral bacterial community       | Shannon                    | Non | [15] |
| Diarrhea (C. difficile), humans               | Human, non-zoonotic | Disease state                    | Fecal bacterial community      | Genus richness             | Non | [16] |
| Human papilloma virus, humans                 | Human, non-zoonotic | Disease state                    | Vaginal microbiome             | Microbial richness         | Non | [17] |
| E. coli O157:H7                               | Human, non-zoonotic | Invasion of soil                 | Soil microbiota                | Species richness           | Exp | [18] |
| Atopy, humans                                 | Human, non-zoonotic | Reaction severity                | Flowering plants               | Species richness           | Non | [19] |
| Clostridium difficile infection, humans       | Human, non-zoonotic | Disease state                    | Fecal microbiota               | Shannon, rarefaction       | Exp | [20] |
| Vulvovaginal candidiasis, humans              | Human, non-zoonotic | Disease state                    | Vaginal microbiota             | Shannon diversity (genera) | Non | [21] |
| Clostridium difficile infection, humans       | Human, non-zoonotic | Disease state                    | Gut microbiota                 | Shannon, species richness  | Non | [22] |
| C. diff–negative nosocomial diarrhea, humans  | Human, non-zoonotic | Disease state                    | Gut microbiota                 | Shannon, species richness  | Non | [22] |
| Chronic obstructive pulmonary disease, humans | Human, non-zoonotic | Disease state                    | Lung microbiome                | Shannon, species richness  | Non | [23] |

|                                                                        |                     |                              |                                   |                                      |     |      |
|------------------------------------------------------------------------|---------------------|------------------------------|-----------------------------------|--------------------------------------|-----|------|
| Candida infection, humans                                              | Human, non-zoonotic | Pathogen load                | Salivary microbiome               | Shannon, simpson                     | Non | [24] |
| Endodontic infection, humans                                           | Human, non-zoonotic | Disease state                | Oral microbiota                   | Shannon, simpson                     | Non | [25] |
| Contact-lens related eye disease, humans                               | Human, non-zoonotic | Disease severity             | Bacteria in contact lens cases    | Shannon                              | Non | [26] |
| Colorectal cancer, humans                                              | Human, non-zoonotic | Disease state                | Gut microbiome                    | Shannon                              | Non | [27] |
| Eczema, infant humans                                                  | Human, non-zoonotic | Disease status               | Gut microbiota                    | Shannon                              | Non | [28] |
| Candidatus phytoplasma proliferation disease, apples                   | Human, non-zoonotic | Infection status             | Endophytic bacterial community    | Species richness, rarefaction curves | Non | [29] |
| Dental caries, humans                                                  | Human, non-zoonotic | Disease severity             | Tooth surface bacterial community | Shannon                              | Non | [30] |
| Obstructive pulmonary disease, humans                                  | Human, non-zoonotic | Disease severity             | Lung microbiome                   | Shannon, Simpson                     | Non | [31] |
| Type-2 diabetes, humans                                                | Human, non-zoonotic | Disease status               | Gut microbiota                    | Shannon                              | Non | [32] |
| Wheezing, infant humans                                                | Human, non-zoonotic | Disease status               | Oropharyngeal microbiome          | Shannon, rarefaction curves          | Non | [33] |
| Inflammatory bowel disease, humans                                     | Human, non-zoonotic | Disease status               | Gut microbiota                    | Shannon                              | Non | [34] |
| Periodontal disease, humans                                            | Human, non-zoonotic | Disease status               | Oral microbiota                   | Shannon                              | Non | [35] |
| Colorectal adenoma, humans                                             | Human, non-zoonotic | Disease status               | Rectal microbiota                 | Species richness                     | Non | [36] |
| Cystic fibrosis, humans                                                | Human, non-zoonotic | Disease status               | Lung microbiota                   | Species richness                     | Non | [37] |
| Atopic eczema, infant humans                                           | Human, non-zoonotic | Disease presence             | Gut microbiota                    | Shannon                              | Non | [38] |
| Tuberculosis, humans                                                   | Human, non-zoonotic | Disease presence             | Bacterial community in sputum     | Shannon                              | Non | [39] |
| Barley/cereal yellow dwarf virus, grasses                              | Plant               | Infection prevalence         | Plant community                   | Species richness                     | Non | [40] |
| Mildew disease, wheat                                                  | Plant               | Disease prevalence           | Wheat strains                     | Strain richness                      | Exp | [41] |
| Anthraxnose, angular leaf spot, black sigatoka, banana, plantain, bean | Plant               | Disease damage to host plant | Crop variety                      | Richness and evenness                | Non | [42] |
| Fungal pathogen Rhizoctonia solani plants                              | Plant               | Infection prevalence         | Plant community                   | Species richness                     | Exp | [43] |

|                                                       |                    |                                      |                                                     |                                |     |      |
|-------------------------------------------------------|--------------------|--------------------------------------|-----------------------------------------------------|--------------------------------|-----|------|
| Huanglongbing disease, plants                         | Plant              | Infection status                     | Endophytic bacterial community                      | Shannon                        | Non | [44] |
| Damping-off, <i>Pythium ultimum</i> , beet            | Plant              | Area under disease progression curve | Soil bacterial community                            | Species richness, Shannon      | Exp | [45] |
| Fungal disease, citrus limon                          | Plant              | Disease severity                     | Fungal epiphyte community                           | Species richness               | Non | [46] |
| Barley/cereal yellow dwarf virus, grasses             | Plant              | Infection prevalence                 | Plant community                                     | Species richness               | Non | [47] |
| Powdery mildew, trees                                 | Plant              | Pathogen load                        | Tree community                                      | Species richness               | Exp | [48] |
| Viral diseases, wild pepper                           | Plant              | Infection prevalence                 | Plant community                                     | Species richness, Shannon      | Non | [49] |
| Sudden oak death, woody plants                        | Plant              | Disease prevalence                   | Host tree community                                 | Species evenness               | Non | [50] |
| Ink disease ( <i>Phytophthora</i> spp), chestnut tree | Plant              | Disease presence                     | Ectomycorrhizal community                           | Shannon                        | Non | [51] |
| Rotavirus, mice                                       | Wildlife/livestock | Disease severity                     | Intestinal microbiome                               | Shannon, phylogenetic richness | Exp | [52] |
| Chytridiomycosis, amphibians                          | Wildlife/livestock | Bd infection prevalence              | Amphibian community                                 | Species richness               | Exp | [53] |
| Colitis, horses                                       | Wildlife/livestock | Disease state                        | Fecal microbiome                                    | Simpson                        | Non | [54] |
| Bovine tuberculosis, cattle                           | Wildlife/livestock | Disease presence                     | Mammal community                                    | Species richness               | Non | [55] |
| Monogenean ectoparasites, fish                        | Wildlife/livestock | Parasite presence, prevalence        | Poeciliid community                                 | Species richness               | Non | [56] |
| Avian malaria                                         | Wildlife/livestock | Infection prevalence                 | Bird community                                      | Species richness               | Non | [57] |
| Ribeiroia infection, amphibians                       | Wildlife/livestock | Infection prevalence                 | Host community                                      | Species richness               | Exp | [58] |
| Ribeiroia infection, amphibians                       | Wildlife/livestock | Infection prevalence                 | Parasite community                                  | Species richness               | Exp | [58] |
| Chytridiomycosis, frogs                               | Wildlife/livestock | Infection prevalence                 | Amphibian community                                 | Shannon                        | Non | [59] |
| Mastitis, dairy cows                                  | Wildlife/livestock | Disease severity                     | Bacterial communities infected and uninfected teats | Shannon                        | Non | [60] |
| Parasite infection, amphibians                        | Wildlife/livestock | Infection success, pathology         | Parasite community                                  | Species richness               | Exp | [61] |
| Trematode infection, frogs                            | Wildlife/livestock | Infection intensity                  | Predator and alternative host community             | Species richness               | Exp | [62] |

|                                         |                    |                                                    |                          |                                      |     |      |
|-----------------------------------------|--------------------|----------------------------------------------------|--------------------------|--------------------------------------|-----|------|
| Gastrointestinal parasites, rodents     | Wildlife/livestock | Parasite prevalence                                | Host community           | Species richness                     | Non | [63] |
| Gastrointestinal parasites, rodents     | Wildlife/livestock | Parasite prevalence                                | Host community           | Shannon                              | Non | [63] |
| Parasites, bumblebees                   | Wildlife/livestock | Infection status                                   | Gut microbiota           | Shannon                              | Non | [64] |
| White plague disease, corals            | Wildlife/livestock | Disease presence                                   | Coral microbiome         | OTU richness, Shannon                | Non | [65] |
| Bovine papillomatous digital dermatitis | Wildlife/livestock | Disease presence                                   | Foot microbiota          | Shannon                              | Non | [66] |
| Trematode infection, amphibians         | Wildlife/livestock | Density of infected hosts                          | Snail community          | Species richness                     | Exp | [67] |
| Clostridium difficile infection, mice   | Wildlife/livestock | Disease presence                                   | Intestinal microbiota    | Shannon                              | Exp | [68] |
| Puumala hantavirus, bank voles          | Zoonotic           | Infection probability                              | Small mammal community   | Number of non-hosts                  | Non | [69] |
| Sin Nombre hantavirus, deer mice        | Zoonotic           | Infection prevalence                               | Small mammal community   | Shannon                              | Non | [70] |
| Chagas disease, mammals                 | Zoonotic           | Parasitemia in wild mammals, exposure rate in dogs | Mammal community         | Species richness                     | Non | [71] |
| West Nile virus, mosquitoes             | Zoonotic           | Infection rates, prevalence                        | Bird community           | Species richness                     | Non | [72] |
| Plague, fleas                           | Zoonotic           | Presence/absence epizootic focus                   | Mammalian community      | Simpson                              | Non | [73] |
| Plague, fleas                           | Zoonotic           | Presence/absence epizootic focus                   | Flea community           | Simpson                              | Non | [73] |
| Ebola virus, bats                       | Zoonotic           | Seroprevalence                                     | Bat colony community     | Species richness                     | Non | [74] |
| Lyme disease, humans                    | Zoonotic           | Number of infected ticks                           | Small mammal community   | Species richness                     | Non | [75] |
| Alveolar echinococcosis, humans         | Zoonotic           | Disease presence                                   | Small mammal community   | Species richness                     | Non | [76] |
| Eastern equine encephalitis virus       | Zoonotic           | Exposure of sentinel chickens                      | Bird community           | Species richness                     | Non | [77] |
| West Nile virus, mosquitoes             | Zoonotic           | Infection prevalence                               | Host community           | Species richness                     | Non | [78] |
| Listeria monocytogenes, soils           | Zoonotic           | Pathogen invasion                                  | Soil microbial community | Species richness, evenness, Shannon, | Exp | [79] |

|                                        |          |                              |                              |                              |     |      |
|----------------------------------------|----------|------------------------------|------------------------------|------------------------------|-----|------|
| Food-borne zoonotic pathogens, rodents | Zoonotic | Infection prevalence         | Small mammal community       | Shannon                      | Non | [80] |
| Toxoplasma gondii ileitis, mice        | Zoonotic | Disease severity             | Intestinal mucosa microbiome | Species and generic richness | Exp | [81] |
| Chagas disease, mammals                | Zoonotic | Parasite infection in vector | Vertebrate community         | Shannon                      | Non | [82] |

## References

1. Junemann, S. *et al.* (2012) Bacterial community shift in treated periodontitis patients revealed by ion torrent 16S rRNA gene amplicon sequencing. *PLoS ONE* 7, e41606. DOI: 10.1371/journal.pone.0041606
2. Liu, B. *et al.* (2012) Deep sequencing of the oral microbiome reveals signatures of periodontal disease. *PLoS ONE* 7, e37919. DOI: 10.1371/journal.pone.0037919
3. Jenq, R.R. *et al.* (2012) Regulation of intestinal inflammation by microbiota following allogeneic bone marrow transplantation. *J. Exp. Med.* 209, 902-910
4. Boissiere, A. *et al.* (2012) Midgut microbiota of the malaria mosquito vector *Anopheles gambiae* and interactions with *Plasmodium falciparum* infection. *Plos Pathog.* 8, e1002742. DOI: 10.1371/journal.ppat.1002742
5. Fodor, A.A. *et al.* (2012) The adult cystic fibrosis airway microbiota is stable over time and infection type, and highly resilient to antibiotic treatment of exacerbations. *PLoS ONE* 7, e45001. DOI: 10.1371/journal.pone.0045001
6. Blainey, P.C. *et al.* (2012) Quantitative analysis of the human airway microbial ecology reveals a pervasive signature for cystic fibrosis. *Sci. Transl. Med.* 4, 153ra130. DOI: 10.1126/scitranslmed.3004458
7. Siddiqui, H. *et al.* (2012) Alterations of microbiota in urine from women with interstitial cystitis. *Bmc Microbiol.* 12, 205. DOI: 10.1186/1471-2180-12-205
8. Abreu, N.A. *et al.* (2012) Sinus microbiome diversity depletion and *Corynebacterium tuberculostrictum* enrichment mediates rhinosinusitis. *Sci. Transl. Med.* 4, 151ra124. DOI: 10.1126/scitranslmed.3003783
9. Shahinas, D. *et al.* (2012) Toward an understanding of changes in diversity associated with fecal microbiome transplantation based on 16S rRNA gene deep sequencing. *Mbio* 3, e00338-12. DOI: 10.1128/mBio.00338-12
10. Filkins, L.M. *et al.* (2012) Prevalence of streptococci and increased polymicrobial diversity associated with cystic fibrosis patient stability. *J. Bacteriol.* 194, 4709-4717
11. Pettigrew, M.M. *et al.* (2012) Upper respiratory tract microbial communities, acute otitis media pathogens, and antibiotic use in healthy and sick children. *Appl. Environ. Microb.* 78, 6262-6270
12. Kong, H.D.H. *et al.* (2012) Temporal shifts in the skin microbiome associated with disease flares and treatment in children with atopic dermatitis. *Genome Res.* 22, 850-859
13. Zhao, J.C. *et al.* (2012) Decade-long bacterial community dynamics in cystic fibrosis airways. *P. Natl. Acad. Sci. USA* 109, 5809-5814
14. Delhaes, L. *et al.* (2012) The airway microbiota in cystic fibrosis: a complex fungal and bacterial community-implications for therapeutic management. *PLoS ONE* 7, e36313. DOI:

10.1371/journal.pone.0036313

15. Ahmed, A. *et al.* (2012) Microbial profiling of dental caries and periodontitis patients using denaturing gradient gel electrophoresis. *Afr. J. Microbiol. Res.* 6, 2559-2566
16. Rea, M.C. *et al.* (2012) Clostridium difficile carriage in elderly subjects and associated changes in the intestinal microbiota. *J. Clin. Microbiol.* 50, 867-875
17. Lee, J.E. *et al.* (2013) Association of the vaginal microbiota with human papillomavirus infection in a Korean twin cohort. *PLoS ONE* 8, e63514. DOI: 10.1371/journal.pone.0063514
18. van Elsas, J.D. *et al.* (2012) Microbial diversity determines the invasion of soil by a bacterial pathogen. *P. Natl. Acad. Sci. USA* 109, 1159-1164
19. Hanski, I. *et al.* (2012) Environmental biodiversity, human microbiota, and allergy are interrelated. *P. Natl. Acad. Sci. USA* 109, 8334-8339
20. Song, Y. *et al.* (2013) Microbiota dynamics in patients treated with fecal microbiota transplantation for recurrent Clostridium difficile infection. *PLoS ONE* 8, e81330. DOI: 10.1371/journal.pone.0081330
21. Liu, M.B. *et al.* (2013) Diverse vaginal microbiomes in reproductive-age women with vulvovaginal candidiasis. *PLoS ONE* 8, e79812. DOI: 10.1371/journal.pone.0079812
22. Antharam, V.C. *et al.* (2013) Intestinal dysbiosis and depletion of butyrogenic bacteria in Clostridium difficile infection and nosocomial diarrhea. *J. Clin. Microbiol.* 51, 2884-2892
23. Zakharkina, T. *et al.* (2013) Analysis of the airway microbiota of healthy individuals and patients with chronic obstructive pulmonary disease by T-RFLP and clone sequencing. *PLoS ONE* 8, e68302. DOI: 10.1371/journal.pone.0068302
24. Kraneveld, E.A. *et al.* (2012) The relation between oral Candida load and bacterial microbiome profiles in Dutch older adults. *PLoS ONE* 7, e42770. DOI: 10.1371/journal.pone.0042770
25. Hsiao, W.W.L. *et al.* (2012) Microbial transformation from normal oral microbiota to acute endodontic infections. *Bmc Genomics* 13, 345. DOI: 10.1186/1471-2164-13-345
26. Wiley, L. *et al.* (2012) Bacterial biofilm diversity in contact lens-related disease: emerging role of Achromobacter, Stenotrophomonas, and Delftia. *Invest. Ophthalm. Vis. Sci.* 53, 3896-3905
27. Ahn, J. *et al.* (2013) Human gut microbiome and risk for colorectal cancer. *Jnci-J. Natl. Cancer I.* 105, 1907-1911
28. Ismail, I.H. *et al.* (2012) Reduced gut microbial diversity in early life is associated with later development of eczema but not atopy in high-risk infants. *Pediat. Allerg. Imm-Uk.* 23, 674-681
29. Bulgari, D. *et al.* (2012) Endophytic bacterial community living in roots of healthy and 'Candidatus Phytoplasma mali'-infected apple (Malus domestica, Borkh.) trees. *Anton. Leeuw. Int. J. G.* 102, 677-687
30. Gross, E.L. *et al.* (2012) Beyond Streptococcus mutans: dental caries onset linked to multiple species by 16S rRNA community analysis. *PLoS ONE* 7, e47722. DOI: 10.1371/journal.pone.0047722
31. Pragman, A.A. *et al.* (2012) The lung microbiome in moderate and severe chronic obstructive pulmonary disease. *PLoS ONE* 7, e47305. DOI: 10.1371/journal.pone.0047305
32. Qin, J.J. *et al.* (2012) A metagenome-wide association study of gut microbiota in type 2 diabetes. *Nature* 490, 55-60
33. Cardenas, P.A. *et al.* (2012) Upper airways microbiota in antibiotic-naive wheezing and healthy infants from the tropics of rural Ecuador. *PLoS ONE* 7, e46803. DOI: 10.1371/journal.pone.0046803

34. Andoh, A., *et al.* (2012) Multicenter analysis of fecal microbiota profiles in Japanese patients with Crohn's disease. *J. Gastroenterol.* 47, 1298-1307
35. Scher, J.U. *et al.* (2012) Periodontal disease and the oral microbiota in new-onset rheumatoid arthritis. *Arthritis Rheum-Us.* 64, 3083-3094
36. Sanapareddy, N. *et al.* (2012) Increased rectal microbial richness is associated with the presence of colorectal adenomas in humans. *Isme J.* 6, 1858-1868
37. Stressmann, F.A. *et al.* (2012) Long-term cultivation-independent microbial diversity analysis demonstrates that bacterial communities infecting the adult cystic fibrosis lung show stability and resilience. *Thorax* 67, 867-873
38. Abrahamsson, T.R. *et al.* (2012) Low diversity of the gut microbiota in infants with atopic eczema. *J. Allergy Clin. Immun.* 129, 434-U244
39. Cui, Z.L. *et al.* (2012) Complex sputum microbial composition in patients with pulmonary tuberculosis. *Bmc Microbiol.* 12, 276. DOI: 10.1186/1471-2180-12-276
40. Moore, S.M. and Borer, E.T. (2012) The influence of host diversity and composition on epidemiological patterns at multiple spatial scales. *Ecology* 93, 1095-1105
41. Zeller, S.L. *et al.* (2012) Mixtures of genetically modified wheat lines outperform monocultures. *Ecol. Appl.* 22, 1817-1826
42. Mulumba, J.W. *et al.* (2012) A risk-minimizing argument for traditional crop varietal diversity use to reduce pest and disease damage in agricultural ecosystems of Uganda. *Agr. Ecosyst. Environ.* 157, 70-86
43. Latz, E. *et al.* (2012) Plant diversity improves protection against soil-borne pathogens by fostering antagonistic bacterial communities. *J. Ecol.* 100, 597-604
44. Li, J. *et al.* (2012) Endophytic bacterial community analysis of *Catharanthus roseus* and its association with huanglongbing pathogen. *Wei sheng wu xue bao = Acta microbiologica Sinica* 52, 489-497
45. He, M.M. *et al.* (2012) Short-term fluctuations of sugar beet damping-off by *Pythium ultimum* in relation to changes in bacterial communities after organic amendments to two soils. *Phytopathology* 102, 413-420
46. Douanla-Meli, C. *et al.* (2013) Fungal endophyte diversity and community patterns in healthy and yellowing leaves of Citrus limon. *Fungal Ecol.* 6, 212-222
47. Lacroix, C. *et al.* (2014) Non-random biodiversity loss underlies predictable increases in viral disease prevalence. *J. R. Soc. Interface* 11, 20130947. DOI: 10.1098/rsif.2013.0947
48. Hantsch, L. *et al.* (2013) Species richness and species identity effects on occurrence of foliar fungal pathogens in a tree diversity experiment. *Ecosphere* 4, 81. DOI: 10.1890/es13-00103.1
49. Pagan, I. *et al.* (2012) Effect of biodiversity changes in disease risk: exploring disease emergence in a plant-virus system. *Plos Pathog.* 8, e1002796. DOI: 10.1371/journal.ppat.1002796
50. Metz, M.R. *et al.* (2012) An emergent disease causes directional changes in forest species composition in coastal California. *Ecosphere* 3, 86. DOI: abs/10.1890/ES12-00107.1
51. Scattolin, L. *et al.* (2012) Detecting asymptomatic ink-diseased chestnut trees by the composition of the ectomycorrhizal community. *Forest Pathol.* 42, 501-509
52. Preidis, G.A. *et al.* (2012) Host responses to probiotics determined by nutritional status of rotavirus-infected neonatal mice. *J. Pediatr. Gastr. Nutr.* 55, 299-307
53. Venesky, M. *et al.* (2013) Linking manipulative experiments to field data to test the dilution



effect. *Integr. Comp. Biol.* 53, E385-E385

54. Costa, M.C. *et al.* (2012) Comparison of the fecal microbiota of healthy horses and horses with colitis by high throughput sequencing of the V3-V5 region of the 16S rRNA gene. *PLoS ONE* 7, e41484. DOI: 10.1371/journal.pone.0041484
55. Huang, Y.J. *et al.* (2012) From microbe to microbiota: considering microbial community composition in infections and airway diseases. *Am. J. Resp. Crit. Care* 185, 691-692
56. Dargent, F. *et al.* (2013) Can mixed-species groups reduce individual parasite load? A field test with two closely related Poeciliid fishes (*Poecilia reticulata* and *Poecilia picta*). *PLoS ONE* 8, e56789. DOI: 10.1371/journal.pone.0056789
57. Okanga, S. *et al.* (2013) Landscape structure influences avian malaria ecology in the Western Cape, South Africa. *Landscape Ecol.* 28, 2019-2028
58. Johnson, P.T.J. *et al.* (2013) Host and parasite diversity jointly control disease risk in complex communities. *P. Natl. Acad. Sci. USA* 110, 16916-16921
59. Strauss, A. and Smith, K.G. (2013) Why does amphibian chytrid (*Batrachochytrium dendrobatidis*) not occur everywhere? An exploratory study in Missouri ponds. *PLoS ONE* 8, e76035. DOI: 10.1371/journal.pone.0076035
60. Braem, G. *et al.* (2012) Culture-independent exploration of the teat apex microbiota of dairy cows reveals a wide bacterial species diversity. *Vet. Microbiol.* 157, 383-390
61. Johnson, P.T.J. and Hoverman, J.T. (2012) Parasite diversity and coinfection determine pathogen infection success and host fitness. *P. Natl. Acad. Sci. USA* 109, 9006-9011
62. Orlofske, S.A. *et al.* (2012) Parasite transmission in complex communities: predators and alternative hosts alter pathogenic infections in amphibians. *Ecology* 93, 1247-1253
63. Rendon-Franco, E. *et al.* (2014) Effect of host species diversity on multiparasite systems in rodent communities. *Parasitol. Res.* 113, 447-450
64. Koch, H. *et al.* (2012) Ecological effects on gut bacterial communities in wild bumblebee colonies. *J. Anim. Ecol.* 81, 1202-1210
65. Cardenas, A. *et al.* (2012) Shifts in bacterial communities of two Caribbean reef-building coral species affected by white plague disease. *Isme J.* 6, 502-512
66. Santos, T.M.A. *et al.* (2012) Microbial diversity in bovine papillomatous digital dermatitis in Holstein dairy cows from upstate New York. *Fems Microbiol. Ecol.* 79, 518-529
67. Johnson, P.T.J. *et al.* (2012) Species diversity reduces parasite infection through cross-generational effects on host abundance. *Ecology* 93, 56-64
68. Buffie, C.G. *et al.* (2012) Profound alterations of intestinal microbiota following a single dose of clindamycin results in sustained susceptibility to *Clostridium difficile*-induced colitis. *Infect. Immun.* 80, 62-73
69. Voutilainen, L. *et al.* (2012) Environmental change and disease dynamics: effects of intensive forest management on Puumala hantavirus infection in boreal bank vole populations. *PLoS ONE* 7, e39452. DOI: 10.1371/journal.pone.0039452
70. Lehmer, E.M. *et al.* (2012) The interplay of plant and animal disease in a changing landscape: the role of sudden aspen decline in moderating Sin Nombre virus prevalence in natural deer mouse populations. *Ecohealth* 9, 205-216
71. Xavier, S.C.D. *et al.* (2012) Lower richness of small wild mammal species and Chagas disease risk. *Plos Neglect. Trop. D.* 6, e1647. DOI: 10.1371/Journal.Pntd.0001647
72. Johnson, B.J. *et al.* (2012) The roles of mosquito and bird communities on the prevalence of

West Nile virus in urban wetland and residential habitats. *Urban Ecosyst.* 15, 513-531

73. Eisen, R.J. *et al.* (2012) Flea diversity as an element for persistence of plague bacteria in an East African plague focus. *PLoS ONE* 7, e35598. DOI: 10.1371/journal.pone.0035598
74. Serra-Cobo, J. *et al.* (2013) Ecological factors associated with European bat Lyssavirus seroprevalence in Spanish bats. *PLoS ONE* 8, e64467. DOI: 10.1371/journal.pone.0064467
75. Werden, L. *et al.* (2014) Geography, deer, and host biodiversity shape the pattern of Lyme disease emergence in the Thousand Islands archipelago of Ontario, Canada. *PLoS ONE* 9, e85640. DOI: 10.1371/journal.pone.0085640
76. Giraudoux, P. *et al.* (2013) Drivers of *Echinococcus multilocularis* transmission in China: small mammal diversity, landscape or climate? *Plos Neglect. Trop. D.* 7, e2045. DOI: 10.1371/Journal.Pntd.0002045
77. Estep, L.K. *et al.* (2013) Risk of exposure to Eastern equine encephalomyelitis virus increases with the density of Northern cardinals. *PLoS ONE* 8, e57879. DOI: 10.1371/journal.pone.0057879
78. Campbell, R. *et al.* (2013) Host-selection patterns of *Culex tarsalis* (Diptera: Culicidae) determine the spatial heterogeneity of West Nile virus enzootic activity in Northern California. *J. Med. Entomol.* 50, 1303-1309
79. Vivant, A.L. *et al.* (2013) Microbial diversity and structure are drivers of the biological barrier effect against *Listeria monocytogenes* in soil. *PLoS ONE* 8, e76991. DOI: 10.1371/journal.pone.0076991
80. Kilonzo, C. *et al.* (2013) Fecal shedding of zoonotic blood-borne pathogens by wild rodents in a major agricultural region of the Central California Coast. *Appl. Environ. Microb.* 79, 6337-6344
81. Craven, M. *et al.* (2012) Inflammation drives dysbiosis and bacterial invasion in murine models of ileal Crohn's disease. *PLoS ONE* 7, e41594. DOI: 10.1371/journal.pone.0041594
82. Gottdenker, N.L. *et al.* (2012) Host life history strategy, species diversity, and habitat influence *Trypanosoma cruzi* vector infection in changing landscapes. *Plos. Neglect. Trop. D.* 6, e1884. DOI: 10.1371/Journal.Pntd.0001884
